# Supplementary material for: Structural Basis of Phosphatidic Acid Sensing by APH in Apicomplexan Parasites
Source: PubMed Central journal article supplement (PMC6084407; doi:10.1016/j.str.2018.05.001), 2018-08-07
Supplement: mmc1.pdf [file mmc1.pdf]

**Structure, Volume 26**

**Supplemental Information**

**Structural Basis of Phosphatidic Acid**

**Sensing by APH in Apicomplexan Parasites**

**Nick Darvill, David J. Dubois, Sarah L. Rouse, Pierre-Mehdi Hammoudi, Tom Blake, Stefi Benjamin, Bing Liu, Dominique Soldati-Favre, and Steve Matthews**

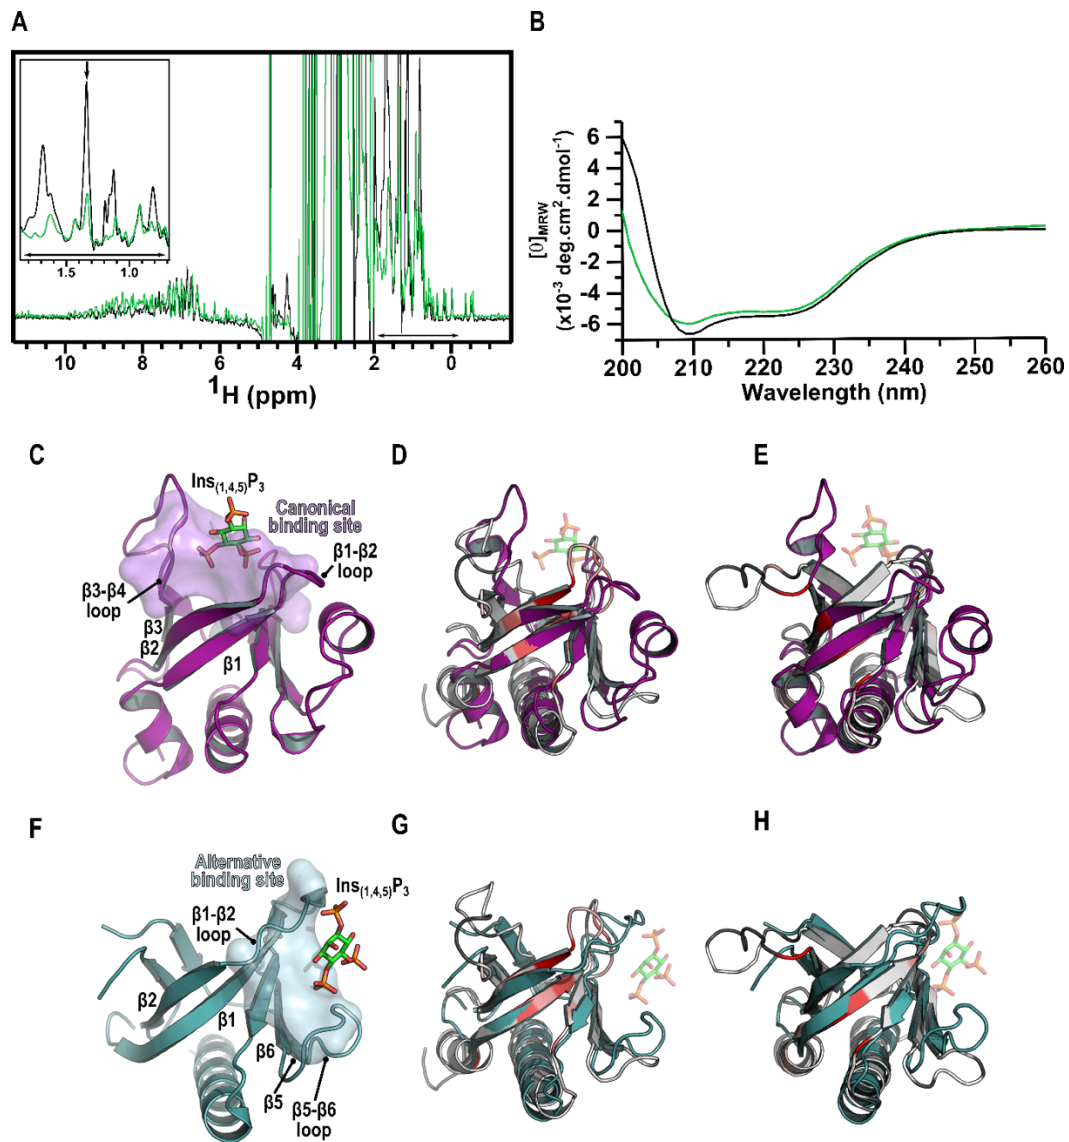

**SI Figure S1 (Related to Figure 1 and 2). Comparison between TgAPH<sub>22-229</sub> and TgAPH<sub>99-229</sub> HSQC spectra, and APH compared to canonical and alternative binding PH domains.** A) Overlay of 1D NMR spectra for TgAPH<sub>99-229</sub> (green) and TgAPH<sub>22-229</sub> (black). Inset, enlarged 1D spectral region highlights the peak corresponding to Ala methyl groups (indicated by a black arrow) that in TgAPH<sub>22-229</sub>, has a lower intensity than expected. B) CD spectra for TgAPH<sub>99-229</sub> (green) and TgAPH<sub>22-229</sub> (black). C) Cartoon representation of the crystal structure of the PH domain from *R.norvegicus* PLC\_δ1 (PDB ID 1MAI) bound to inositol 1,4,5-triphosphate (Ins<sub>(1,4,5)</sub>P<sub>3</sub>) as an example of a canonical binding PH domain. The canonical binding site is represented as a purple semi-transparent surface. D) and E) PLC\_δ1 PH domain aligned to PfAPH<sub>106-235</sub> and TgAPH<sub>99-229</sub> respectively with bound Ins<sub>(1,4,5)</sub>P<sub>3</sub> shown for reference to the canonical binding site. F) Cartoon representation of the crystal structure of the PH domain from human ArhGAP9 (PDB ID 2p0D) bound to Ins<sub>(1,4,5)</sub>P<sub>3</sub> as an example of an alternative binding PH domain. The alternative binding site is represented as a cyan semi-transparent surface. G) and H) ArhGAP9 PH domain aligned to PfAPH<sub>106-235</sub> and TgAPH<sub>99-229</sub> respectively with bound Ins<sub>(1,4,5)</sub>P<sub>3</sub> shown for reference to the alternative binding site.

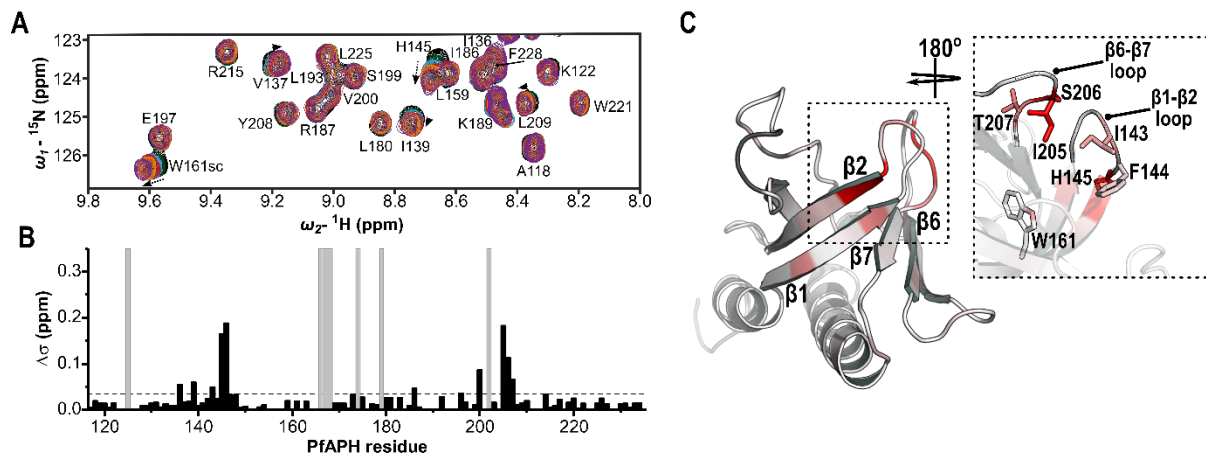

**SI Figure S2 (Related to Figure 2). PfAPH<sub>106-235</sub> titration with PA enriched bicelles.** A) Representative data showing overlay of <sup>15</sup>N-labelled PfAPH<sub>106-235</sub> 2D <sup>1</sup>H-<sup>15</sup>N HSQC spectra in the presence of increasingly PA enriched bicelles with the following DHPC:DMPC:POPA composition: *black*, 75%:25%:25%; *green*, 75%:24%:1%; *blue*, 75%:18.75%:6.25%; *red*, 75%:16.25%:8.75%; *orange*, 75%:12.5%:12.5%; *purple*, 75%:10%:15%. B) Plot of CSPs observed in A) upon titration with DHPC:POPC:POPA (75%:12.5%:12.5%) bicelles, versus PfAPH<sub>106-235</sub> sequence number, residues that could not be assigned are indicated by a grey bar. Prominent CSP's are categorised as greater than 2 $\sigma$ 's from the mean noise (0.035ppm), which is represented by a dotted line. C) CSPs mapped onto the structure of PfAPH<sub>106-235</sub>, coloured in a 20 interval *red* spectrum. A more intense colouring indicates a greater CSP as each interval represents 0.5 $\sigma$  from the mean noise. Key residues clustered around the  $\beta 1$ - $\beta 2$  and  $\beta 6$ - $\beta 7$  loops are labelled, unassigned residues are coloured *dark grey*.

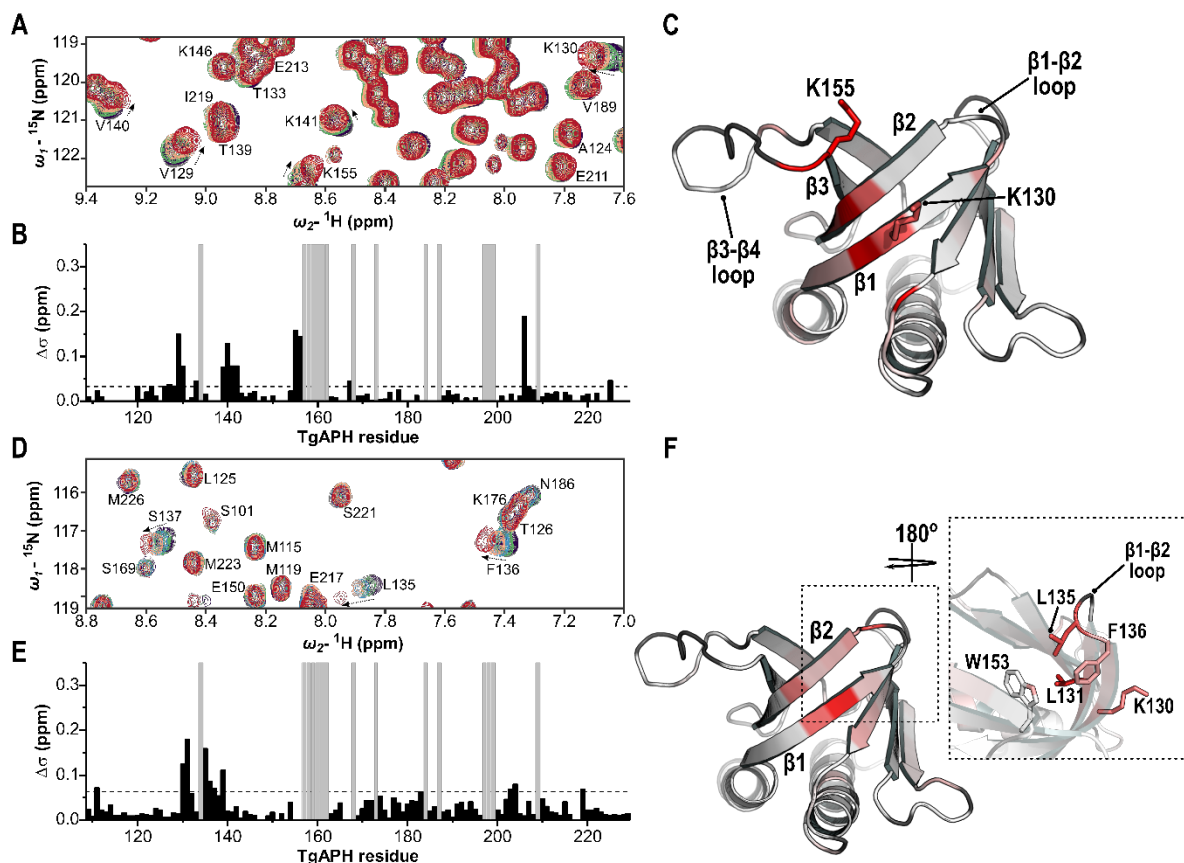

**SI Figure S3 (Related to Figure 2). Mapping the TgAPH<sub>99-229</sub>:PA interface.** A) Overlay of representative  $^{15}\text{N}$ -labelled TgAPH<sub>99-229</sub> 2D  $^1\text{H}$ - $^{15}\text{N}$  HSQC spectra recorded upon titration with increasing molar ratios of short-chain PA. HSQC spectra are coloured according to the molar ratio between  $^{15}\text{N}$ -labelled TgAPH<sub>99-229</sub> and short-chain PA; *grey* 1:0, *purple* 1:1, *green* 1:3, *orange* 1:7, *red* 1:15. B) Plot of CSPs observed in A) upon titration with 15-fold molar excess of short-chain PA, versus TgAPH<sub>99-229</sub> sequence number. Residues that could not be assigned are indicated by a grey bar. Prominent CSP's are categorised as greater than  $2\sigma$ 's from the mean noise (0.032ppm), which is represented by a dotted line. C) CSPs observed in A) mapped onto the structure of TgAPH<sub>99-229</sub>, coloured in a 20 interval *red* spectrum. A more intense colouring indicates a greater CSP as each interval represents  $0.5\sigma$  from the mean noise. Key residues clustered around the  $\beta 1$  strand and  $\beta 3$ - $\beta 4$  loop region are labelled, unassigned residues are coloured *dark grey*. D) Representative data showing overlay of  $^{15}\text{N}$ -labelled TgAPH<sub>99-229</sub> 2D  $^1\text{H}$ - $^{15}\text{N}$  HSQC spectra in the presence of increasingly PA enriched bicelles with the following DHPC:DMPC:POPA composition: *purple*, 75%:12.5%:12.5%; *green*, 75%:24%:1%; *blue*, 75%:18.75%:6.25%; *orange*, 75%:16.25%:8.75%; *red*, 75%:12.5%:12.5%. E) Plot of CSPs observed in D) upon titration with DHPC:POPC:POPA (75%:12.5%:12.5%) bicelles, versus PfAPH<sub>106-235</sub> sequence number, residues that could not be assigned are indicated by a grey bar. Prominent CSP's are categorised as greater than  $2\sigma$ 's from the mean noise (0.062ppm), which is represented by a dotted line. F) CSPs observed in D) mapped onto the structure of TgAPH<sub>99-229</sub>, coloured as in C). Key residues clustered around the  $\beta 1$ - $\beta 2$  loop are labelled.

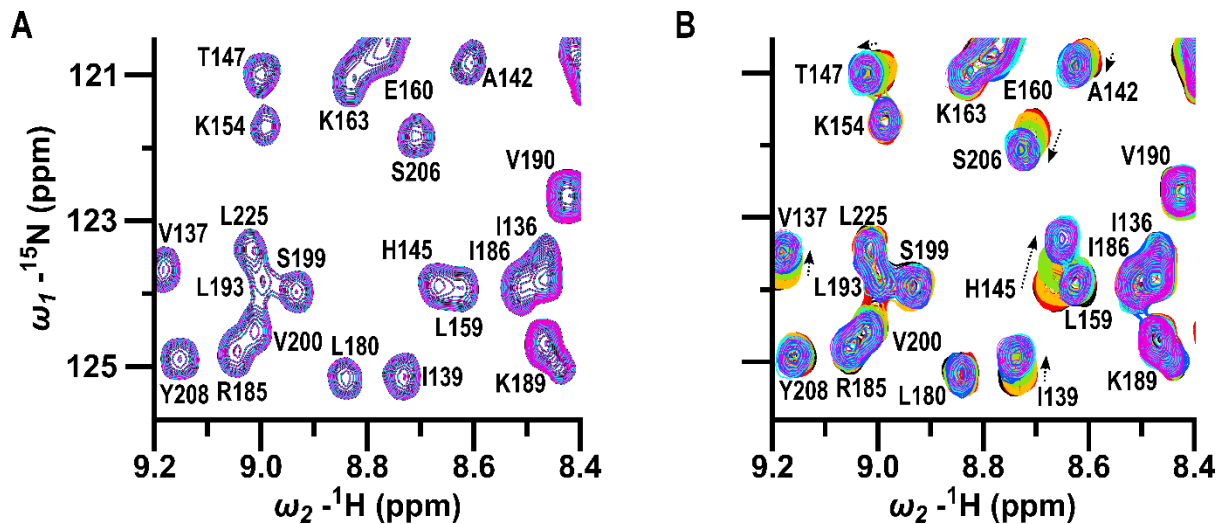

**SI Figure S4 (Related to Figure 2). APH does not bind PI<sub>(4,5)</sub>P<sub>2</sub> and is incapable of dual lipid recognition.** A) Overlay of representative <sup>15</sup>N- PfAPH<sub>106-235</sub> 2D <sup>1</sup>H-<sup>15</sup>N HSQC spectra recorded upon titration with increasing molar ratios of phosphatidylinositol 4,5 bisphosphate (PI<sub>(4,5)</sub>P<sub>2</sub>). HSQC spectra are coloured according to the molar ratio between <sup>15</sup>N-labelled PfAPH and PI<sub>(4,5)</sub>P<sub>2</sub>; *black* 1:0, *cyan* 1:1, *purple* 1:2, *magenta* 1:4. HSQC spectra have decreasing line thickness to illustrate that peaks are overlaid. B) Overlay of representative <sup>15</sup>N-labelled PfAPH<sub>106-235</sub> 2D <sup>1</sup>H-<sup>15</sup>N HSQC spectra recorded upon initial titration with increasing molar ratios of short-chain PA and then titration with increasing molar ratios of PI<sub>(4,5)</sub>P<sub>2</sub>. HSQC spectra are coloured according to the molar ratio between <sup>15</sup>N-labelled PfAPH<sub>106-235</sub>, short-chain PA and PI<sub>(4,5)</sub>P<sub>2</sub>; *black* 1:0:0, *red* 1:1:0, *orange* 1:3:0, *lime* 1:7:0, *blue* 1:15:0, *cyan* 1:15:1, *purple* 1:15:2, *magenta* 1:15:8. Note that CSP's are only observed for peaks upon titration with short-chain PA.

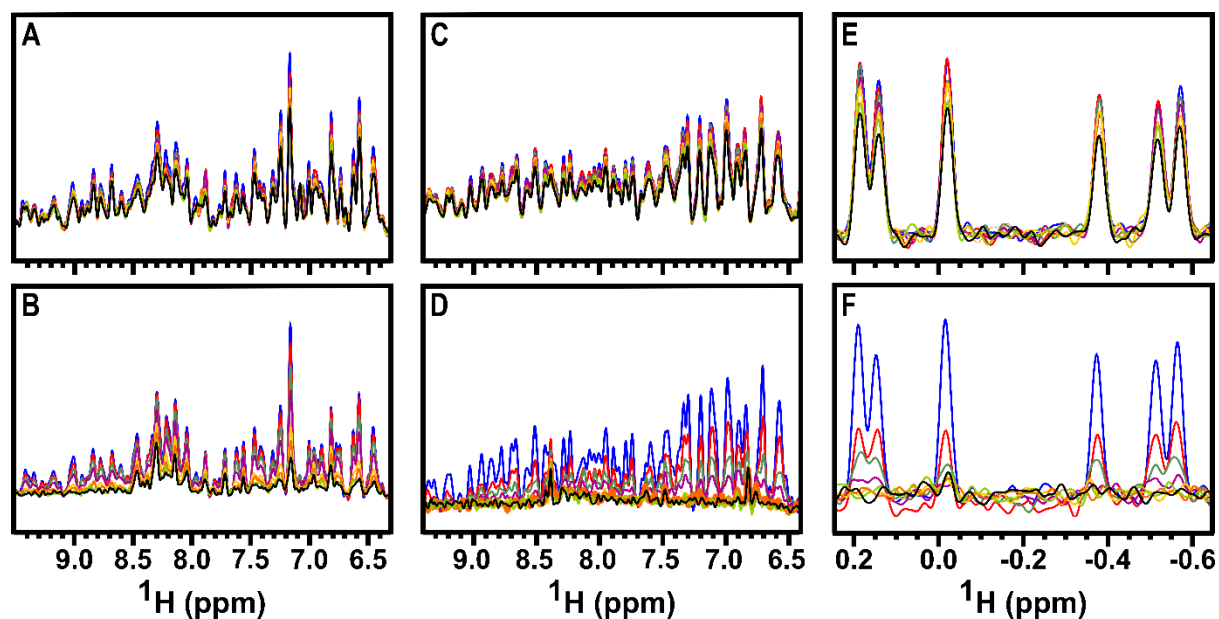

**SI Figure S5 (Related to Figure 3). APH titration with SUVs.** A) PfAPH<sub>106-235</sub> 1D <sup>1</sup>H NMR spectral region corresponding to the downfield-shifted amide region (9.5 to 6.3 ppm) recorded upon titration with increasing concentration of SUVs composed of A) POPC (100%) or B) POPC and POPA (50%:50%). TgAPH<sub>99-229</sub> 1D <sup>1</sup>H NMR spectral region corresponding to the downfield-shifted amide region (9.4 to 6.4 ppm) recorded upon titration with increasing concentration of SUVs composed of C) POPC (100%) or D) POPC and POPA (50%:50%). E) and F) identical to C) and D) but for TgAPH<sub>99-229</sub> 1D <sup>1</sup>H NMR spectral region corresponding to the upfield-shifted methyl region (0.25 to -0.65 ppm). APH:SUVs (total lipid) molar ratio: *blue*, free APH in solution; *red* 1:2; *green* 1:4; *purple* 1:7; *yellow* 1:15; *orange* 1:20; *lime* 1:25; *black* 1:30.

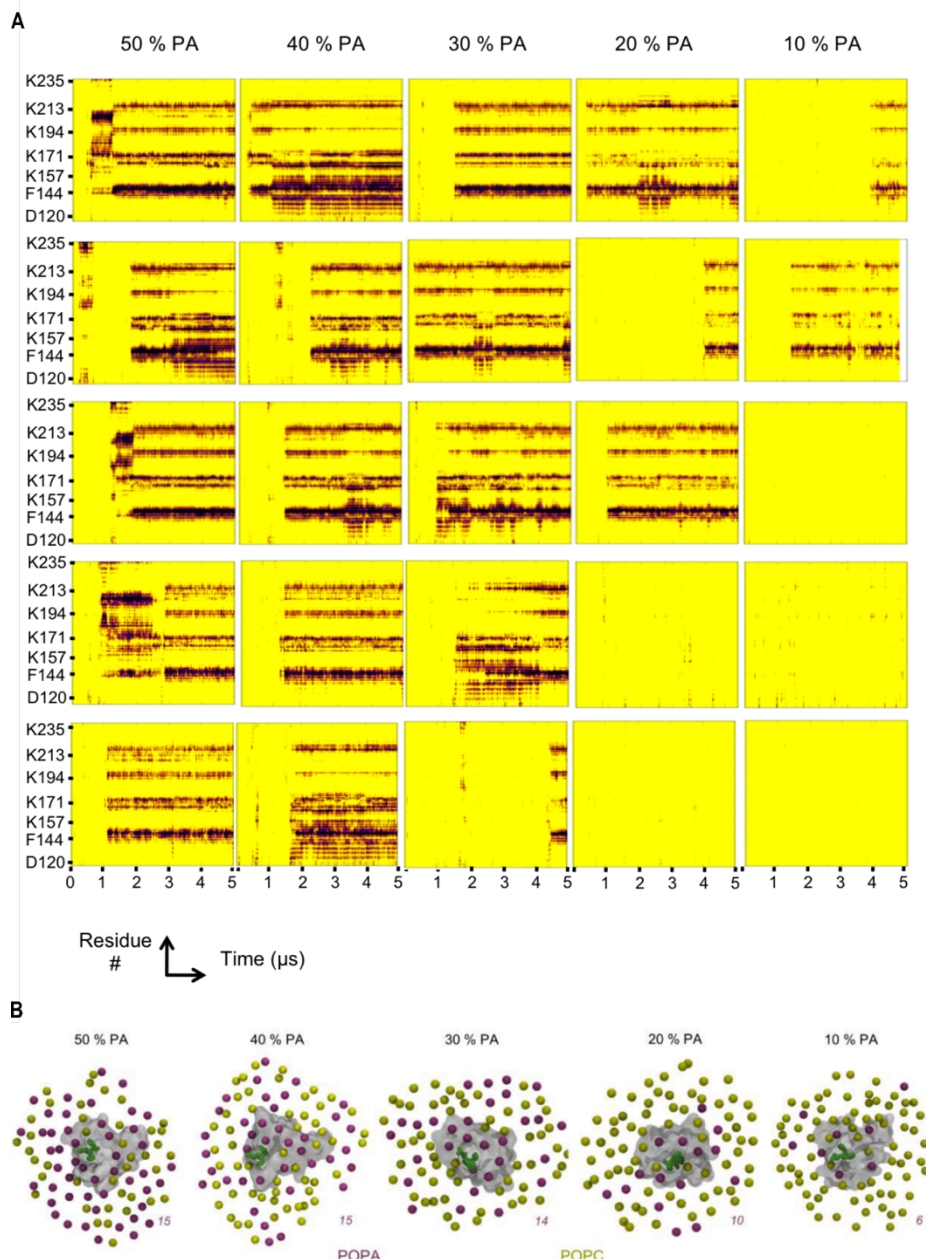

**SI Figure S6 (Related to Figure 6). Close contact plots between PfAPH<sub>106-235</sub> residues and POA lipid headgroups, and clustering of POA around the PfAPH<sub>106-235</sub> surface.**

A) Residues are coloured purple when the distance from a POA headgroup particle is below a cut-off of 1 nm, shown for 5 different simulations. The pattern of contacts between the protein and POA is consistently observed at all 5 concentrations of POA, indicating that PfAPH<sub>106-235</sub> predominantly adopts a single, stable orientation within the membrane. Upon finding the most favourable bound orientation the protein is not observed to depart the membrane for the remainder of the simulation time. B) Representative snapshots at each membrane composition (50- 10% PA) of the bound protein and lipid headgroup phosphate particles are shown. POA headgroups are shown as purple spheres and POPC in yellow. The protein is shown as a grey surface with the buried hydrophobic residues I143-H145 shown as green ball and sticks. The POA headgroups (purple) are observed to cluster together in the region of PfAPH<sub>106-235</sub> at all POA concentrations. The maximum number of POA within 1 nm of the protein surface for each PA composition is shown.

**SI Table S1 (Related to STAR Methods). Plasmids used in this study.**

| Plasmid                                                           | Description                        | Source                |
|-------------------------------------------------------------------|------------------------------------|-----------------------|
| <b>For expression of full length APH and C-terminal PH domain</b> |                                    |                       |
| pNIC28a-Bsa4_PfAPH <sub>106-235</sub>                             | 6xHis-TEV-PfAPH <sub>106-235</sub> | This paper            |
| pNIC28a-Bsa4_TgAPH <sub>99-229</sub>                              | 6xHis-TEV-TgAPH <sub>99-229</sub>  | This paper            |
| pNIC28a-Bsa4_TgAPH <sub>22-229</sub>                              | 6xHis-TEV-TgAPH <sub>22-229</sub>  | This paper            |
| <b>For functional characterization of TgAPH in T. gondii</b>      |                                    |                       |
| iKD-GAC-DHFR                                                      | iKD-template                       | (Jacot et al., 2016)  |
| pSAG1::CAS9-GFP-U6::sgUPRT                                        | UPRT-Cas9 guide                    | (Shen et al., 2014)   |
| pSAG1::CAS9-GFP-U6::sgTgAPH                                       | TgAPH-Cas9 guide                   | This paper            |
| pT8-N21-Ty-APH-BleO                                               | Intermediate plasmid               | (Bullen et al., 2016) |
| 5'UPRT-pT8-MycGFPPfMyoAtail-Ty-3'UPRT                             | Intermediate plasmid               | (Jacot et al., 2016)  |
| pTub5-CAT                                                         | Intermediate plasmid               | (Kim et al., 1993)    |
| 5'UPRT-CAT-pT8-N21-Ty-APH-3'UPRT                                  | TgAPH-N21Ty                        | This paper            |
| 5'UPRT-CAT-pT8-N21-Ty-APH-K130A+K132A-3'UPRT                      | TgAPH-N21Ty-K130A+K132A            | This paper            |
| 5'UPRT-CAT-pT8-N21-Ty-APH-L135A+F136A-3'UPRT                      | TgAPH-N21Ty-L135A+F136A            | This paper            |
| 5'UPRT-CAT-pT8-N21-Ty-APH-K155A+K157A-3'UPRT                      | TgAPH-N21Ty-L155A+F157A            | This paper            |
| 5'UPRT-CAT-pT8-N21-Ty-APH-E138A-3'UPRT                            | TgAPH-N21Ty-L138A                  | This paper            |
| 5'UPRT-CAT-pT8-N21-Ty-APH-Δ-linker-3'UPRT                         | TgAPH-N21Ty-Δ-linker               | This paper            |
| 5'UPRT-CAT-pT8-N21-Ty-APH-Sc-linker-3'UPRT                        | TgAPH-N21Ty-Sc-linker              | This paper            |

**SI Table S2 (Related to STAR Methods). Oligonucleotides used in this study.**

| Oligonucleotide                                                   | Sequence (5'→3')                        |
|-------------------------------------------------------------------|-----------------------------------------|
| <b>For expression of full length APH and C-terminal PH domain</b> |                                         |
| Fw_PfAPH                                                          | TACTTCCAATCCATGAAACTGAGCACCGAT          |
| Rv_PfAPH                                                          | TATCCACCTTTACTGTCATTTTCATGCTCATAATTTTGC |
| Fw_TgAPH                                                          | TACTTCCAATCCATGTCTGAACCTGACAACG         |



|             |                                          |
|-------------|------------------------------------------|
| Rv_TgAPH    | TATCCACCTTTACTGTTATTTTCATCGACATGAACT     |
| Fw_TgAPH_fl | TACTTCCAATCCATGCACATCAAAGCGAAAACC        |
| Rv_TgAPH_fl | TATCCACCTTTACTGTCATTTTCATCGACATGAACTTCAT |

***Site directed mutagenesis of APH PH domain***

|                      |                                 |
|----------------------|---------------------------------|
| PfAPH_K138A_K140A_Fw | TGCAACCGCGATTTTTTCATGAAAC       |
| PfAPH_K138A_K140A_Rv | ATTGCCACAATTTTGGTCAGGGTTTTG     |
| PfAPH_K163A_K165A_Fw | CGCAAACGATAGCGATGGCAAA          |
| PfAPH_K163A_K165A_Rv | CCTGCATACCATTCCAGCATTTTTG       |
| PfAPH_I143A_F144A_Fw | TAAAACCGCGGCTGCTCATGAAACCGTG    |
| PfAPH_I143A_F144A_Rv | ATTTTCACAATTTTGGTCAG            |
| PfAPH_H145A_Fw       | CGCGATTTTTGCTGAAACCGTGAAAG      |
| PfAPH_H145A_Rv       | GTTTTAATTTTCACAATTTTGGTC        |
| PfAPH_E146A_Fw       | GATTTTTTCATGCAACCGTGAAAG        |
| PfAPH_E146A_Rv       | GCGGTTTTAATTTTCACAATTTTG        |
| TgAPH_K130A_K132A_Fw | CGCGACACACCTCTTTTCTGAG          |
| PfAPH_K130A_K132A_Rv | AGCGCGACAACCTTAGTAAGAGCG        |
| TgAPH_K155A_K157A_Fw | CAAGACACACGCCGCTTCTGAGACAGTGAAG |
| TgAPH_K155A_K157A_Rv | AGCTTGACAACCTTAGTAAG            |
| TgAPH_L135A_F136A_Fw | CAAGACACACGCCGCTTCTGAGACAGTGAAG |
| TgAPH_L135A_F136A_Rv | AGCTTGACAACCTTAGTAAG            |
| TgAPH_E138A_Fw       | CTCTTTTCTGCGACAGTGAAGG          |
| TgAPH_E138A_Rv       | GTGTGTCTTGAGCTTGAC              |

***Functional characterization of TgAPH in T. gondii***

|                  |                                                    |
|------------------|----------------------------------------------------|
| CAT-Rev_2170     | GCCCCGCCCTGCCACTCATCGC                             |
| M13-Rev_4749     | AACAGCTATGACCATG                                   |
| gRNA_4883        | AACTTGACATCCCCATTTAC                               |
| TgAPH_6324 (iKD) | TCCCCACTGCGCATTATTTTGTCTTCCACTTCATGTTTGCGGATCCGGGG |

TgAPH\_6325 (iKD) ACCTGTCAAAGCAGCTCATAGTGTTCCCCATTTTGATATCCCTAGGAA  
TTCAC  
TgAPH\_6326 (APH CRISPR guide) GCGTCGCTGAACCCGCGAGTAGTTTTAGAGCTAGAAATAGC  
TgAPH\_6339Fw (K130A+K132A) CGCGACACACCTCTTTTCTGAG  
TgAPH\_6529 Rv (K130A+K132A) AGCGCGACAACCTTTAGTAAGAGCG  
TgAPH\_6341 Fw (L135A+F136A) CAAGACACACGCGGCGTCTGAGACAGTGAAGG  
TgAPH\_6342 Rv (L135A+F136A) AGCTTGACAACCTTTAGTAAG  
TgAPH\_6343 Fw (K155A+K157A) TGCGAGTACCGCCGGCGCCAGGAC  
TgAPH\_6344 Rv (K155A+K157A) CCCGCGAACCACTGAACCTCTTCTCCATCTTTGCTG  
TgAPH\_6423 Fw (linker deletion) TCTGAACCTGACAACGATGCGG  
TgAPH\_6424 Rv (linker deletion) GGGAGCAGCGGCTCCAGG  
UPRT\_6611 CTCAAGTCTCAAAGCAGATCCGC  
UPRT\_6610 ATCCCCTTCATTTTGCTTACGCAG  
TgAPH\_7327 Rv (E138A) TCTTTTCTGCGACAGTGAAGG  
TgAPH\_7368 Rv (E138A) AGAAAAGAGGTGTGTCTTGAGCTT  
TgAPH\_7399 Fw (Sc-linker) CCCCCGGGGATCTGCGCAGCAGCCAGATGGAAGCGAAAATGCGCT  
ATGATGAAAAATCTGAACCTGACAACGATGCGG  
TgAPH\_7400 Rv (Sc-linker) CCCCCGGGTTGCGCGACGCTGCTGGTTCGGGCGCATGCTTTCCAGGG  
TTTTGCTGCTGGGAGCAGCGGCTCCAGG

**SI Table S3 (Related to STAR Methods). 1D <sup>1</sup>H-NMR LUV titration experiments.**

| <b>Volume of 8mM LUV stock added to NMR sample (μl)</b> | <b>LUV concentration (μM)</b> | <b>APH:LUV ratio</b> |
|---------------------------------------------------------|-------------------------------|----------------------|
| 0.0                                                     | 0                             | 1:0                  |
| 6.9                                                     | 100                           | 1:2                  |
| 7.0                                                     | 200                           | 1:4                  |
| 10.6                                                    | 350                           | 1:7                  |
| 28.7                                                    | 750                           | 1:15                 |
| 18.8                                                    | 1000                          | 1:20                 |
| 19.4                                                    | 1250                          | 1:25                 |
| 20.0                                                    | 1500                          | 1:30                 |
